# Supplementary material
Source: PubMed Central journal article supplement (PMC5678999)

**Figure S2, Related to Figure 1**

**A**

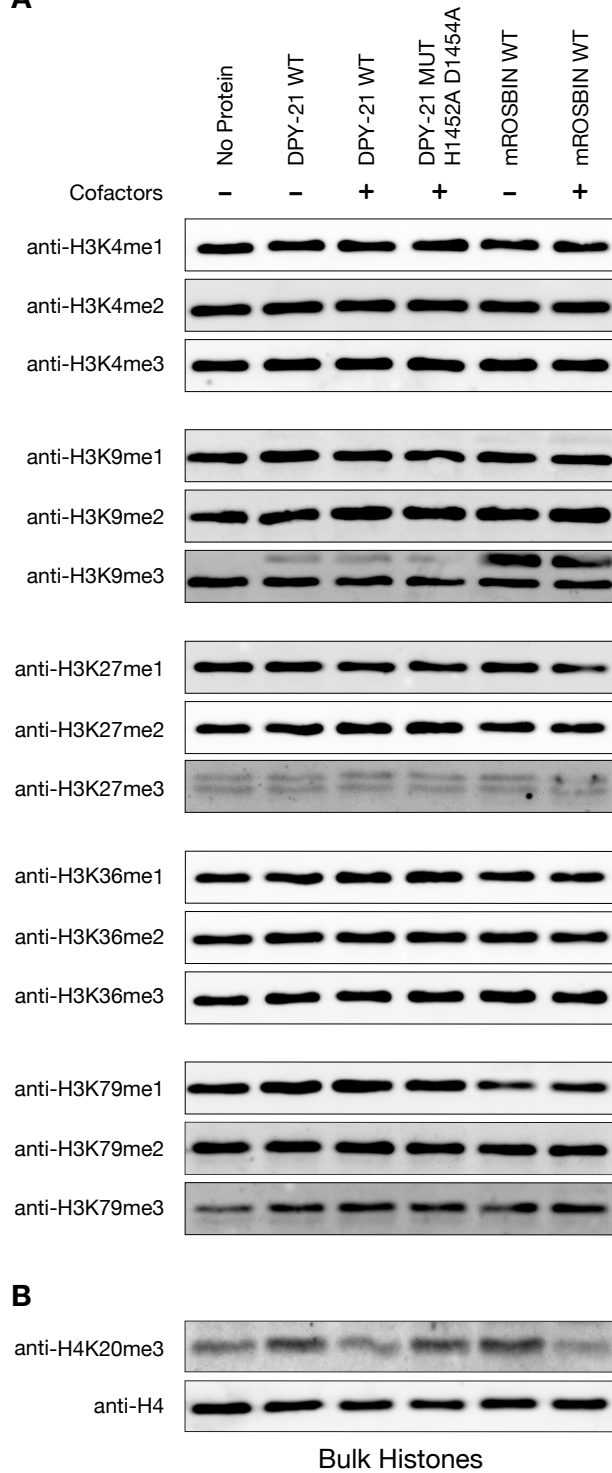

**C**

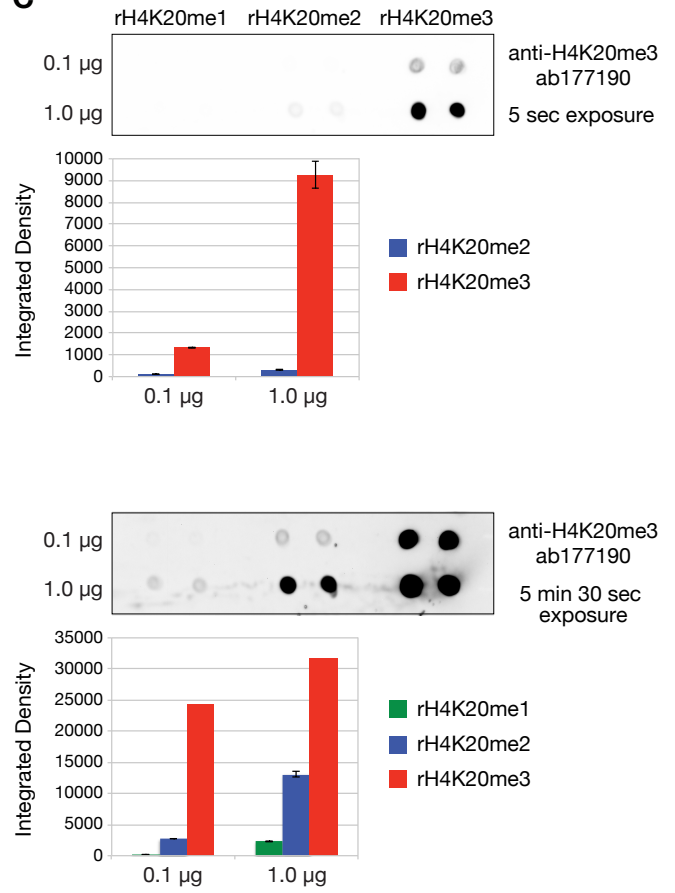

**D**

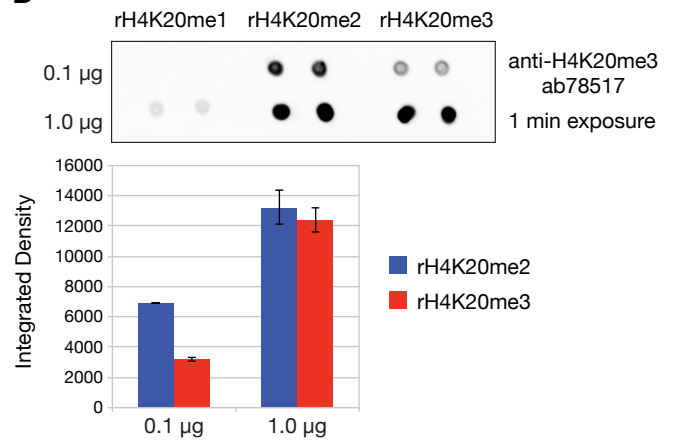

Supplement: NIHMS895835-supplement-3.pdf [file NIHMS895835-supplement-3.pdf]

**Figure S3, Related to Figures 2 and 3**

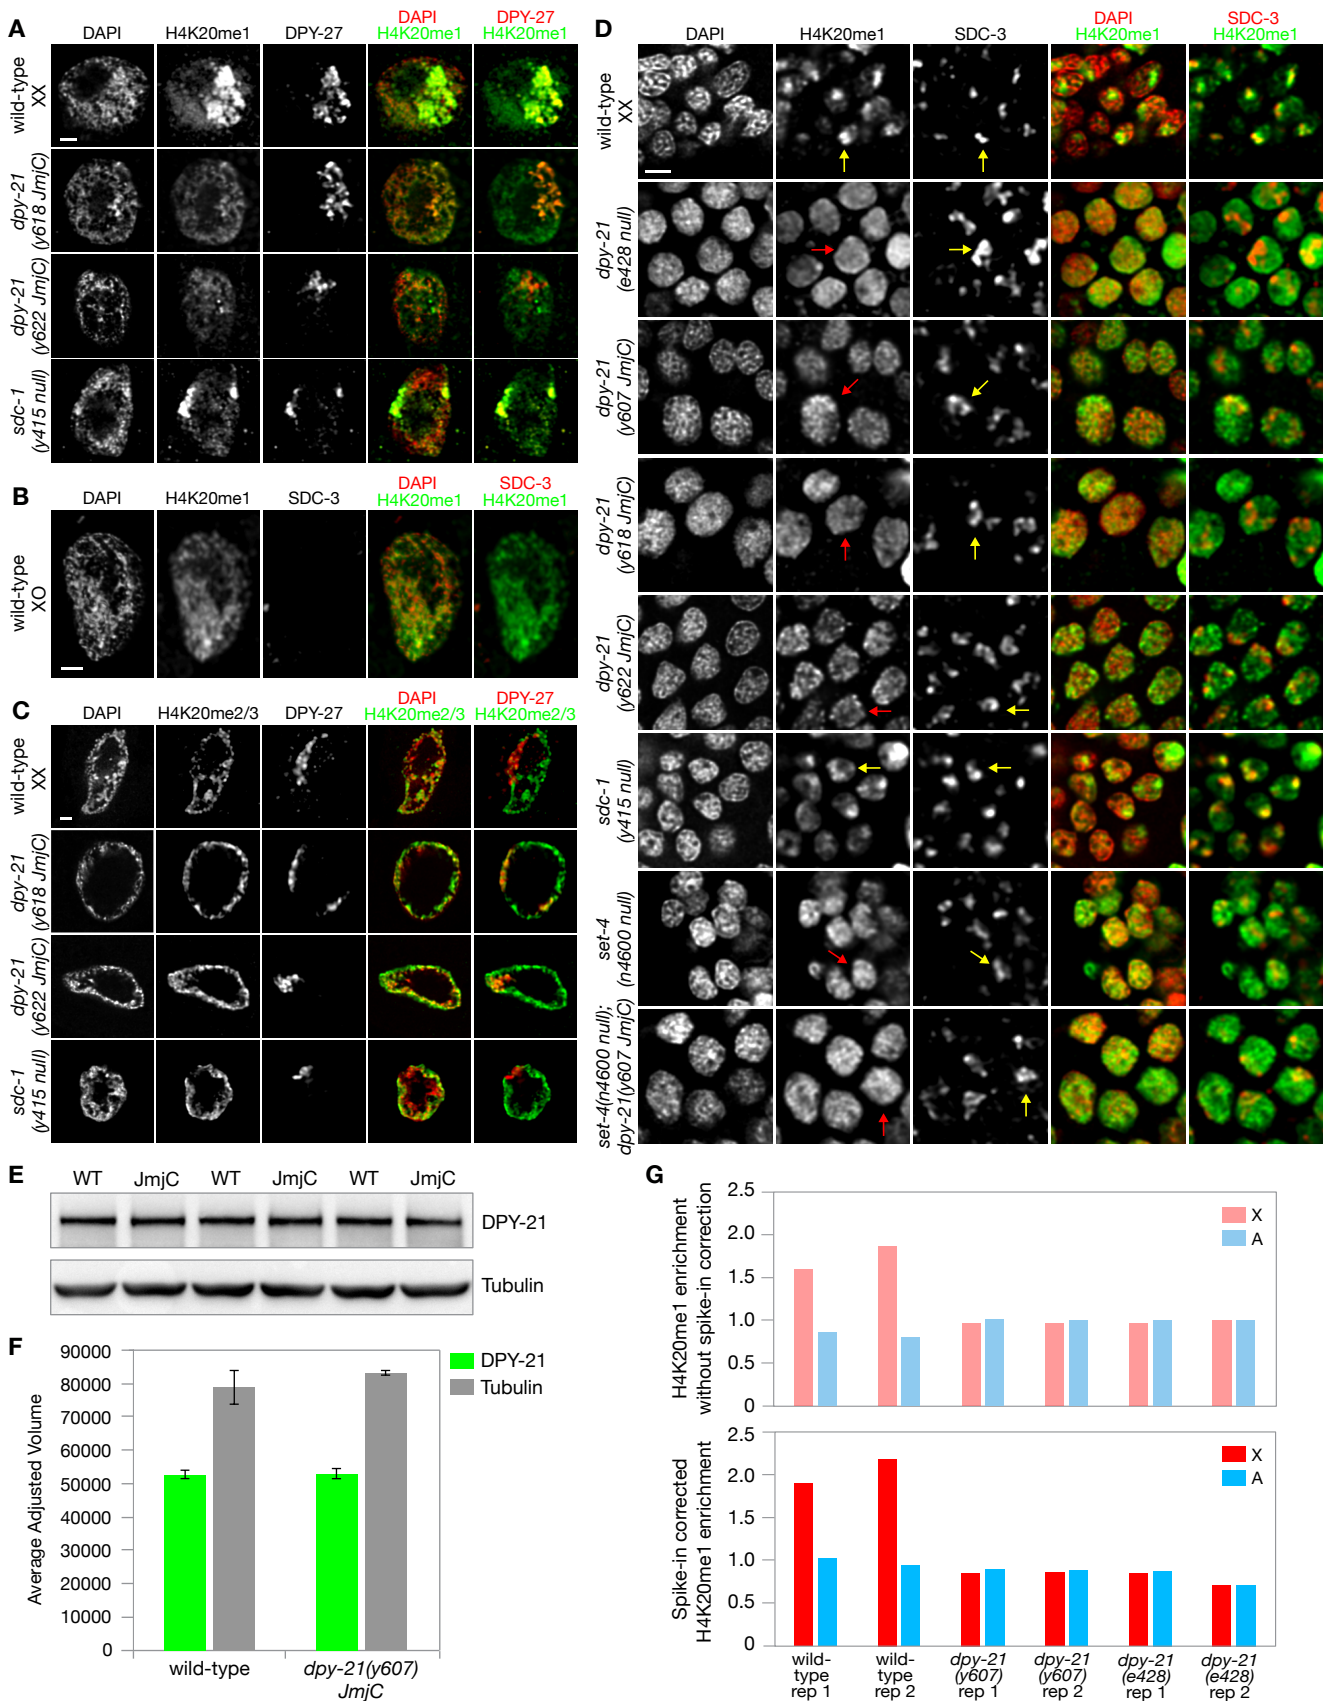

Supplement: NIHMS895835-supplement-4.pdf [file NIHMS895835-supplement-4.pdf]

**Figure S4, Related to Figure 3**

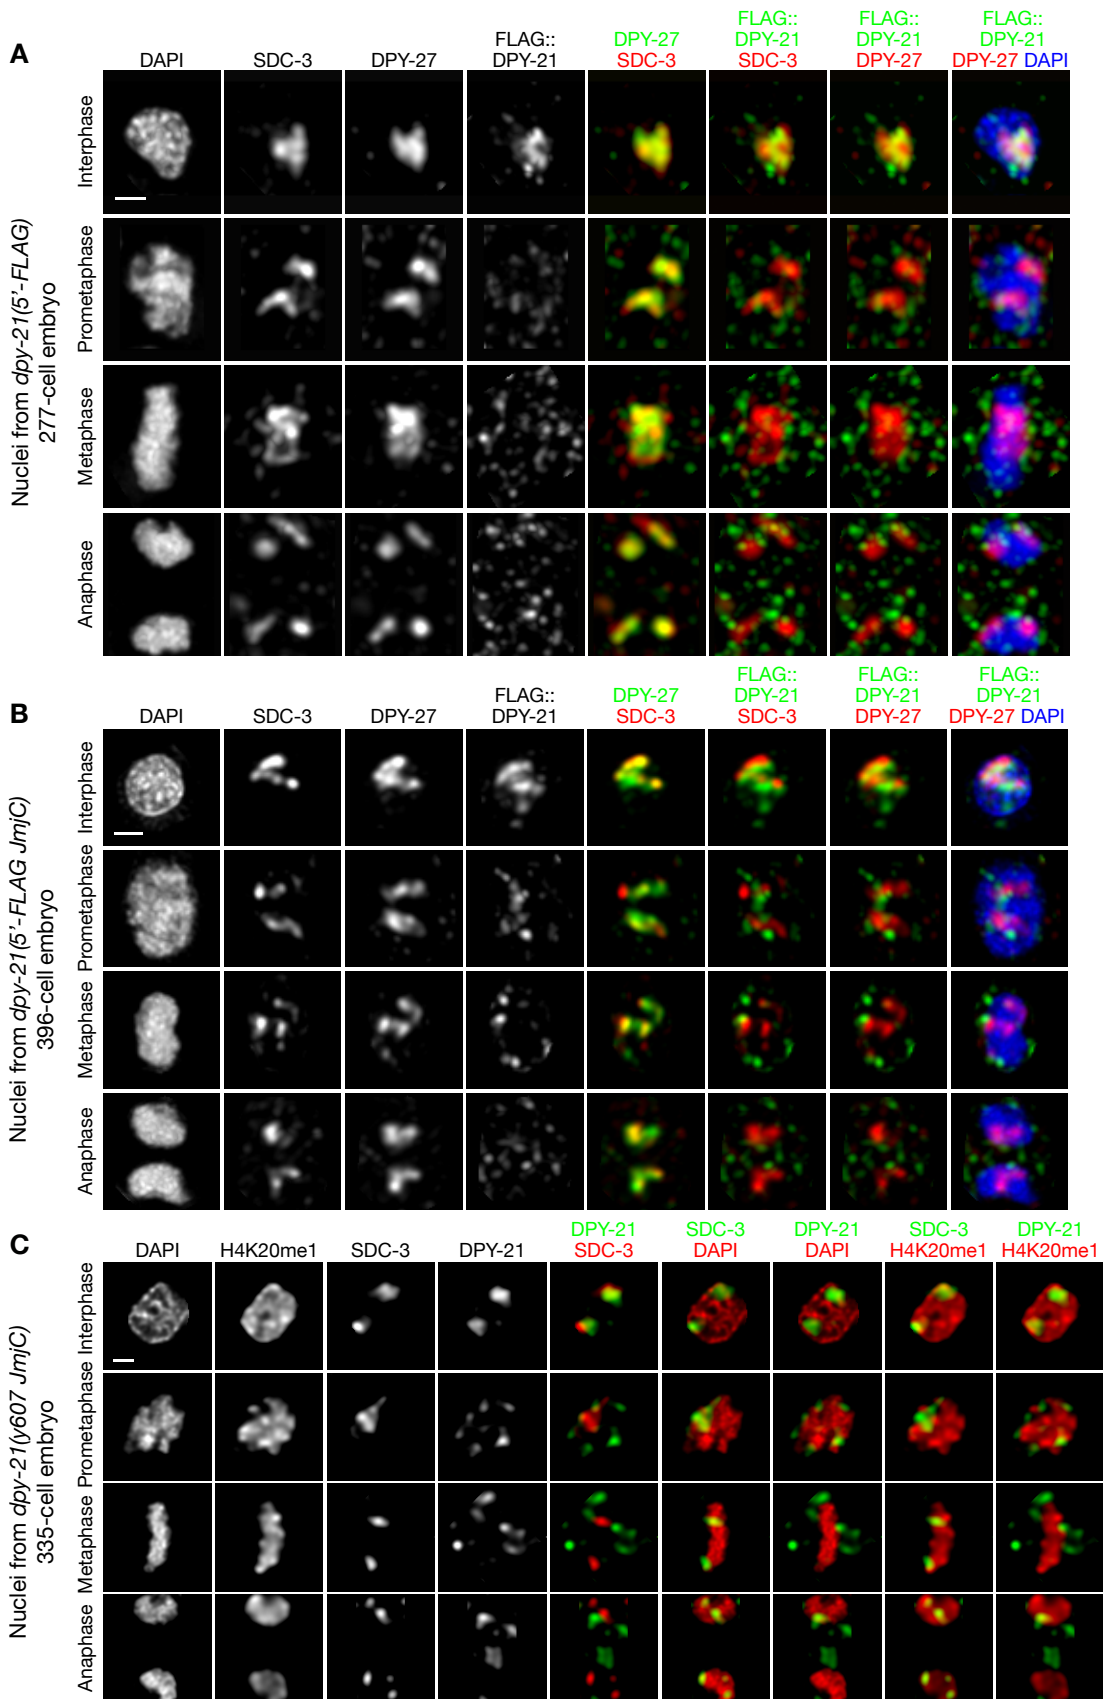

Supplement: NIHMS895835-supplement-5.pdf [file NIHMS895835-supplement-5.pdf]

**Figure S5, Related to Figure 6**

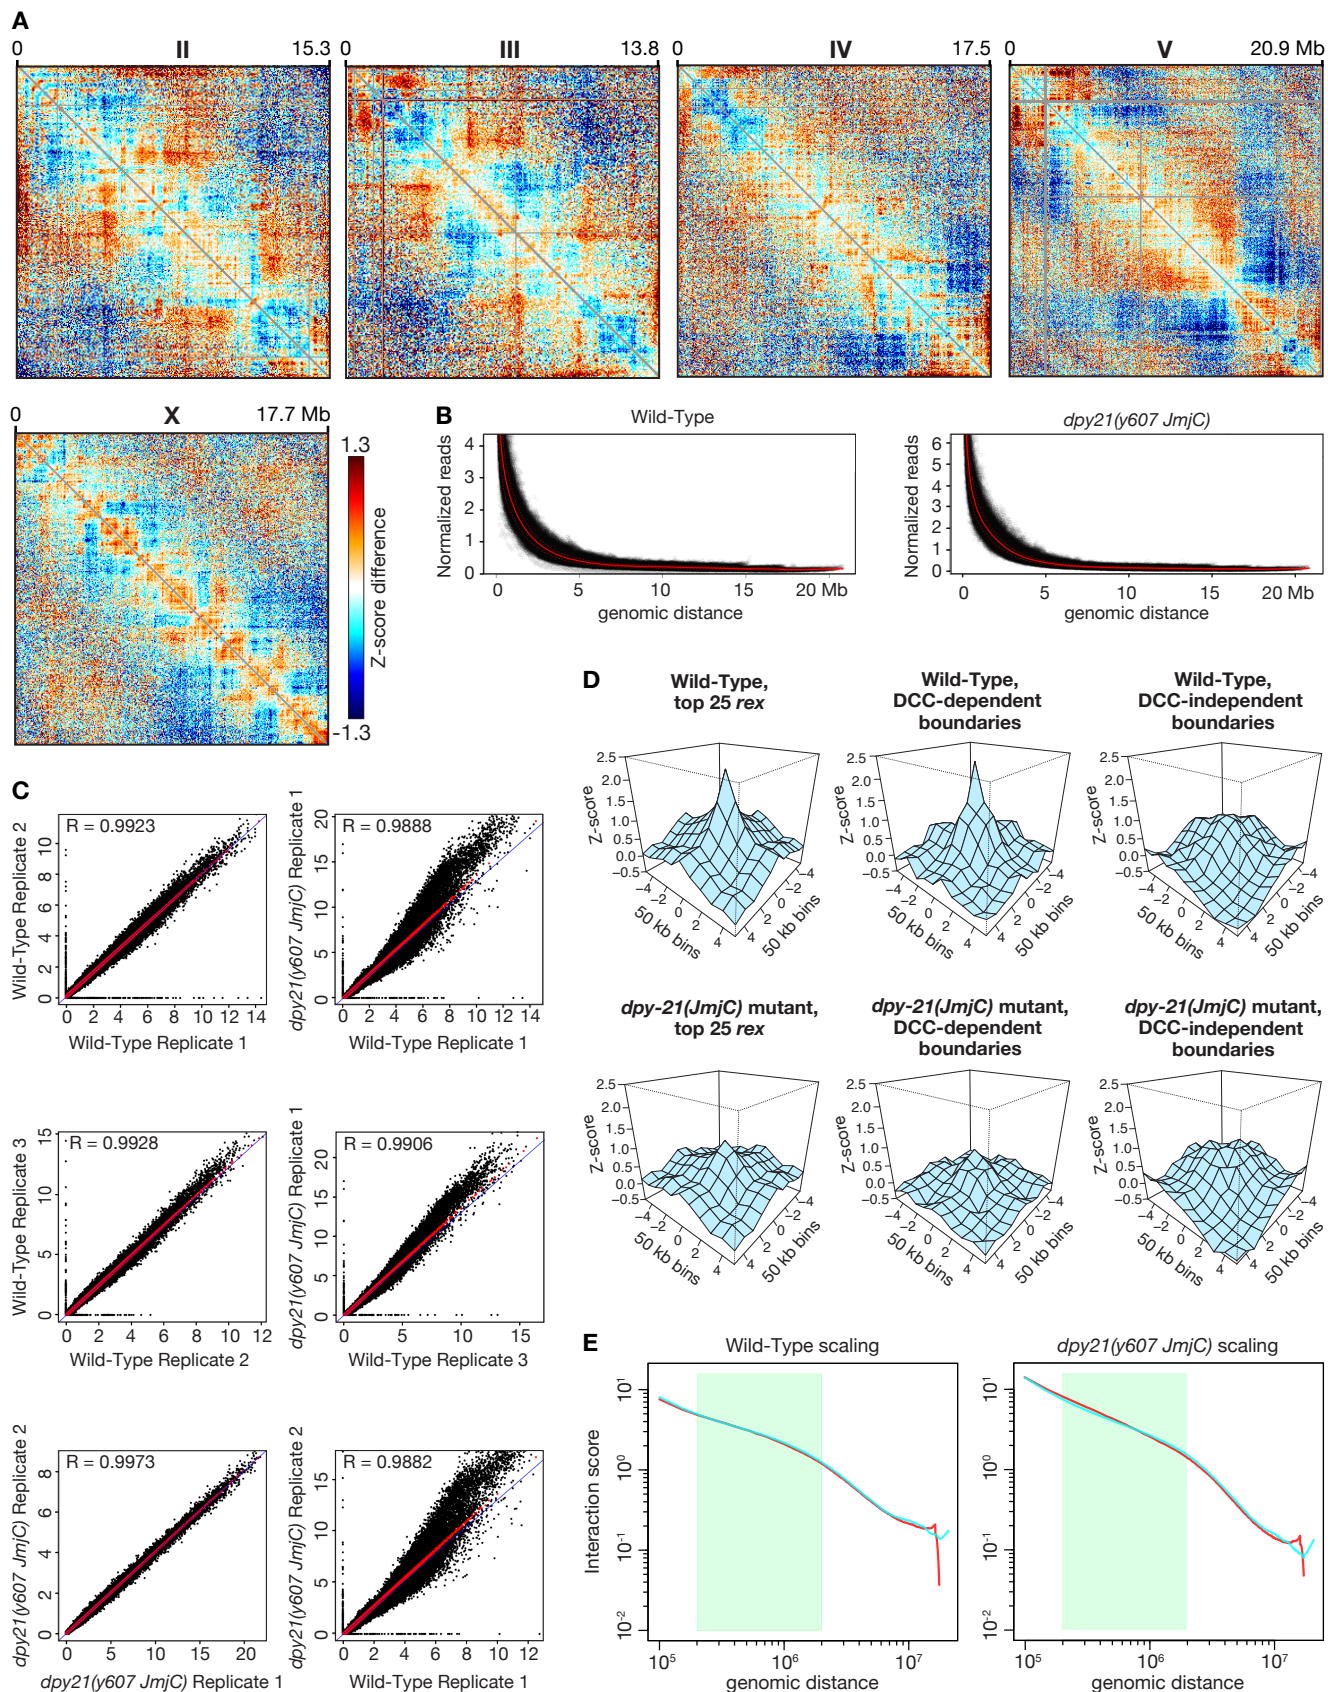

Supplement: NIHMS895835-supplement-6.pdf [file NIHMS895835-supplement-6.pdf]

Figure S6, Related to Figure 6

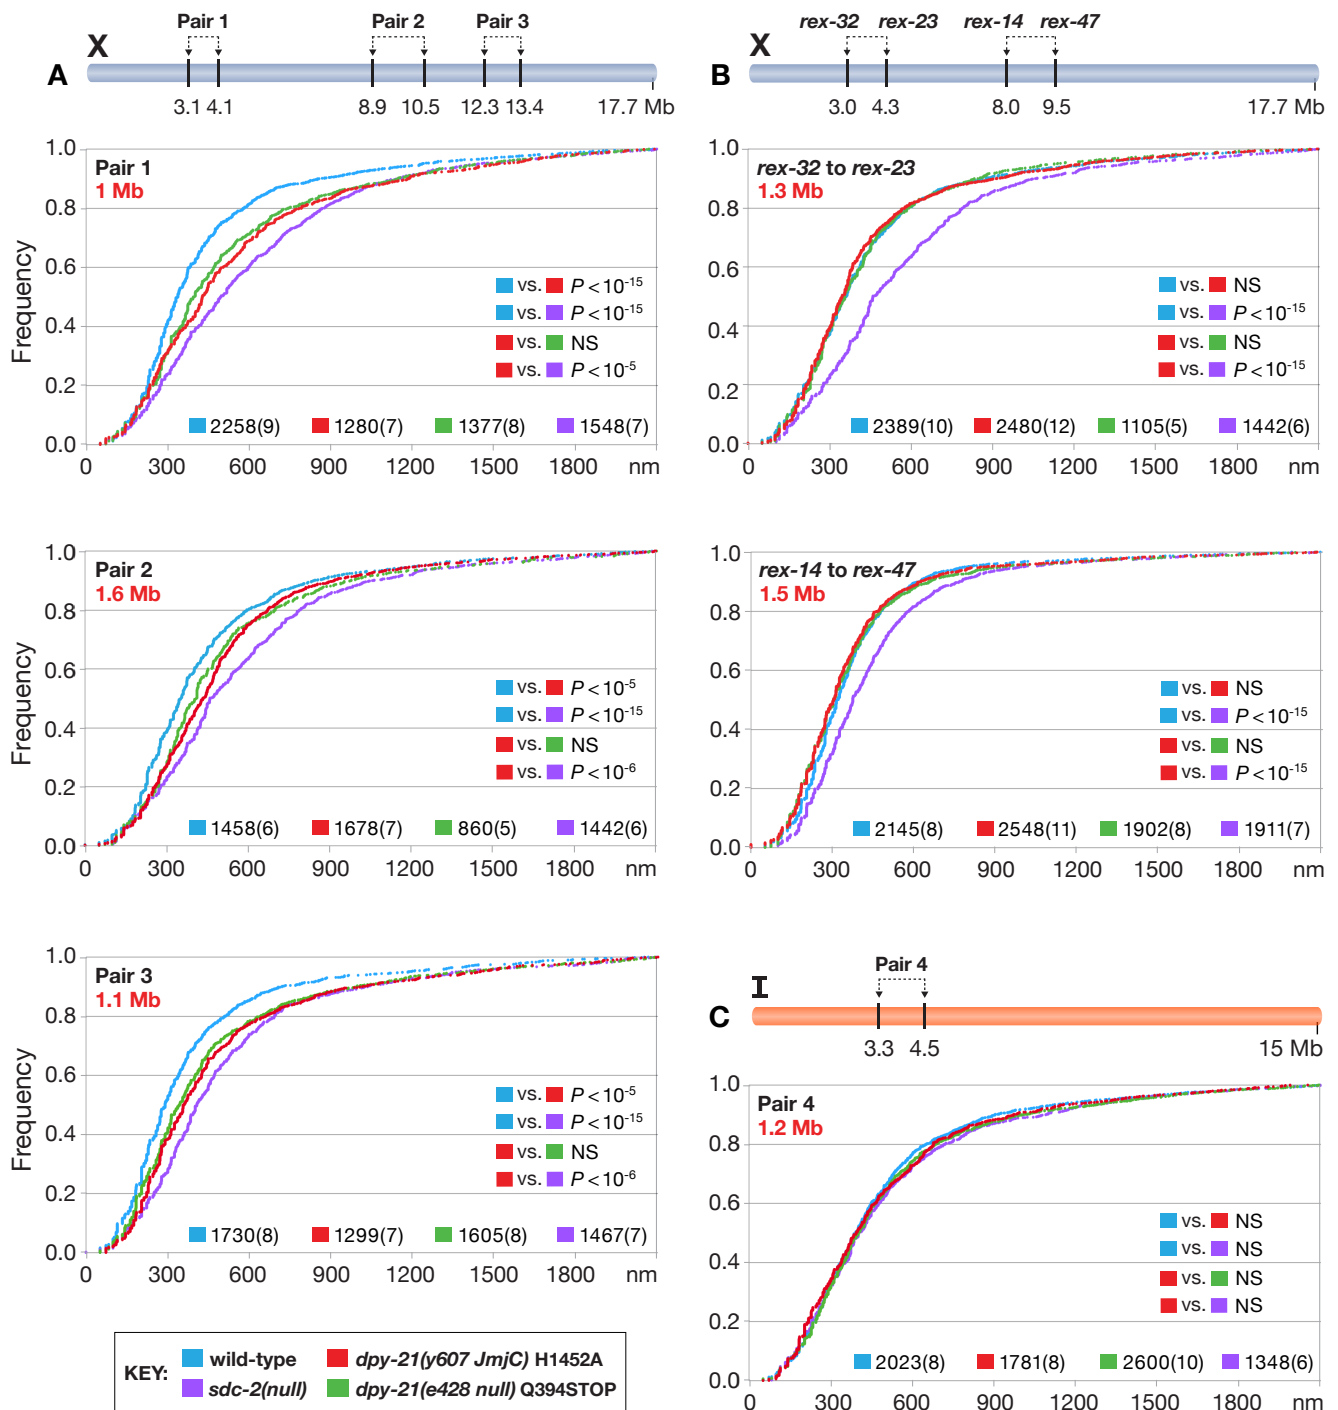

Supplement: NIHMS895835-supplement-7.pdf [file NIHMS895835-supplement-7.pdf]
